# Supplementary material for: 1-(2,5-Dimethoxy-4-nitrophenyl)piperidine and 1-(2,5-dimethoxy-4-nitrophenyl)pyrroridine
Source: Preprints.org preprint supplement (doi:10.20944/preprints202311.0970.v1), 2023-11-15

1-(2,5-Dimethoxy-4-nitrophenyl)piperidine

Tanjia M. Syeda, Muadh R. Al-Shaidi, Ibtihal Basri, Mahboub Merzouk, and Fawaz Aldabbagh*

*****Correspondence: f.aldabbagh@kingston.ac.uk

Spectroscopic Data

**IR of 1-(2,5-dimethoxy-4-nitrophenyl)piperidine (2b)**

**
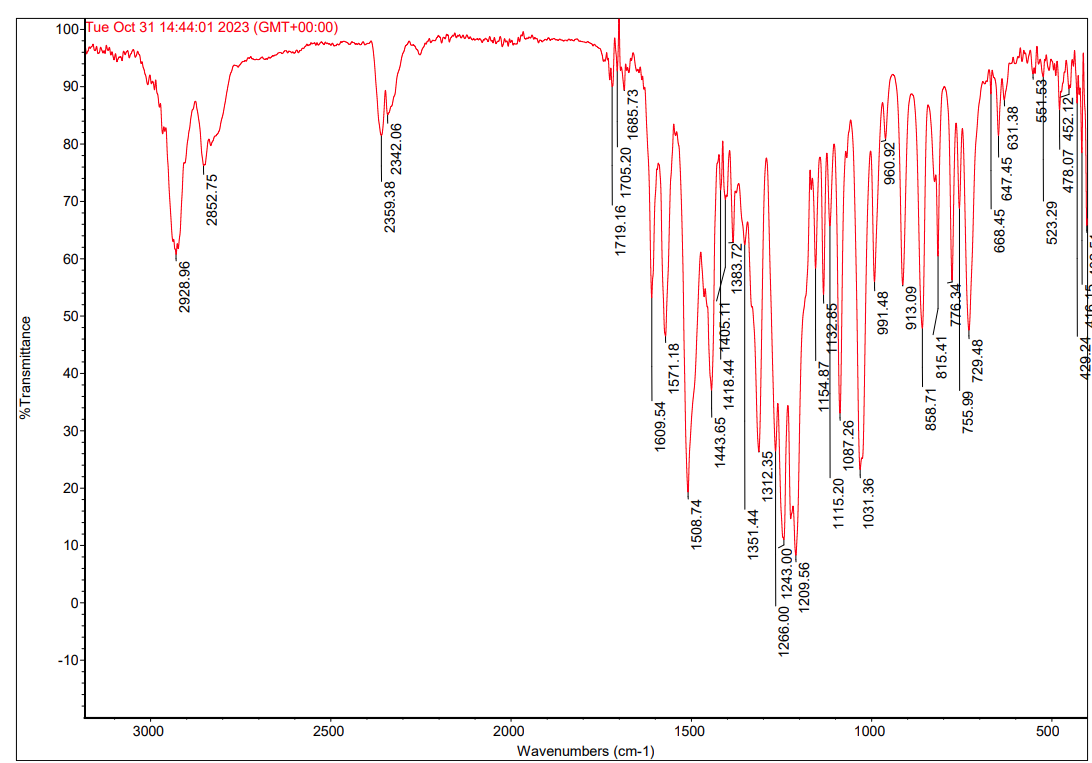
**

**1H NMR (400 MHz) of 1-(2,5-dimethoxy-4-nitrophenyl)piperidine (2b) in CDCl3**


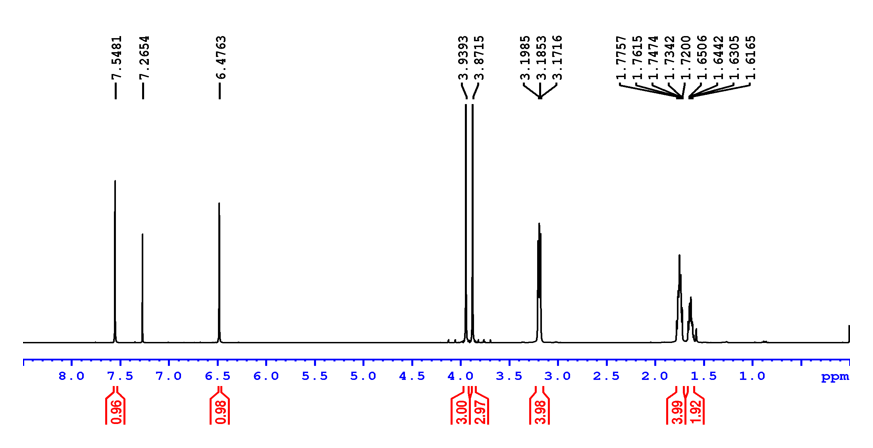


**13C NMR (100 MHz) and DEPT of 1-(2,5-dimethoxy-4-nitrophenyl)piperidine (2b) in CDCl3**


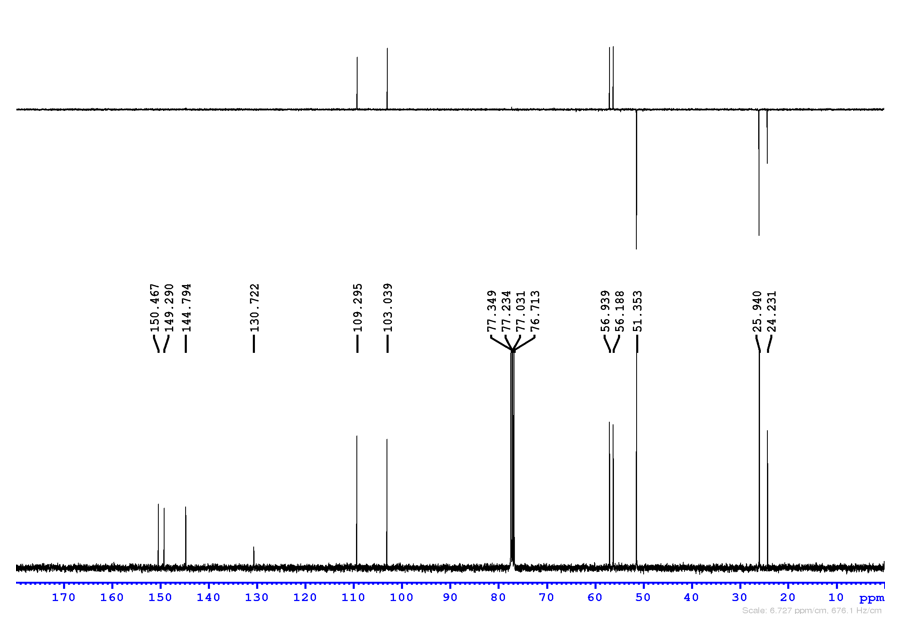


**COSY of 1-(2,5-dimethoxy-4-nitrophenyl)piperidine (2b) in CDCl3**


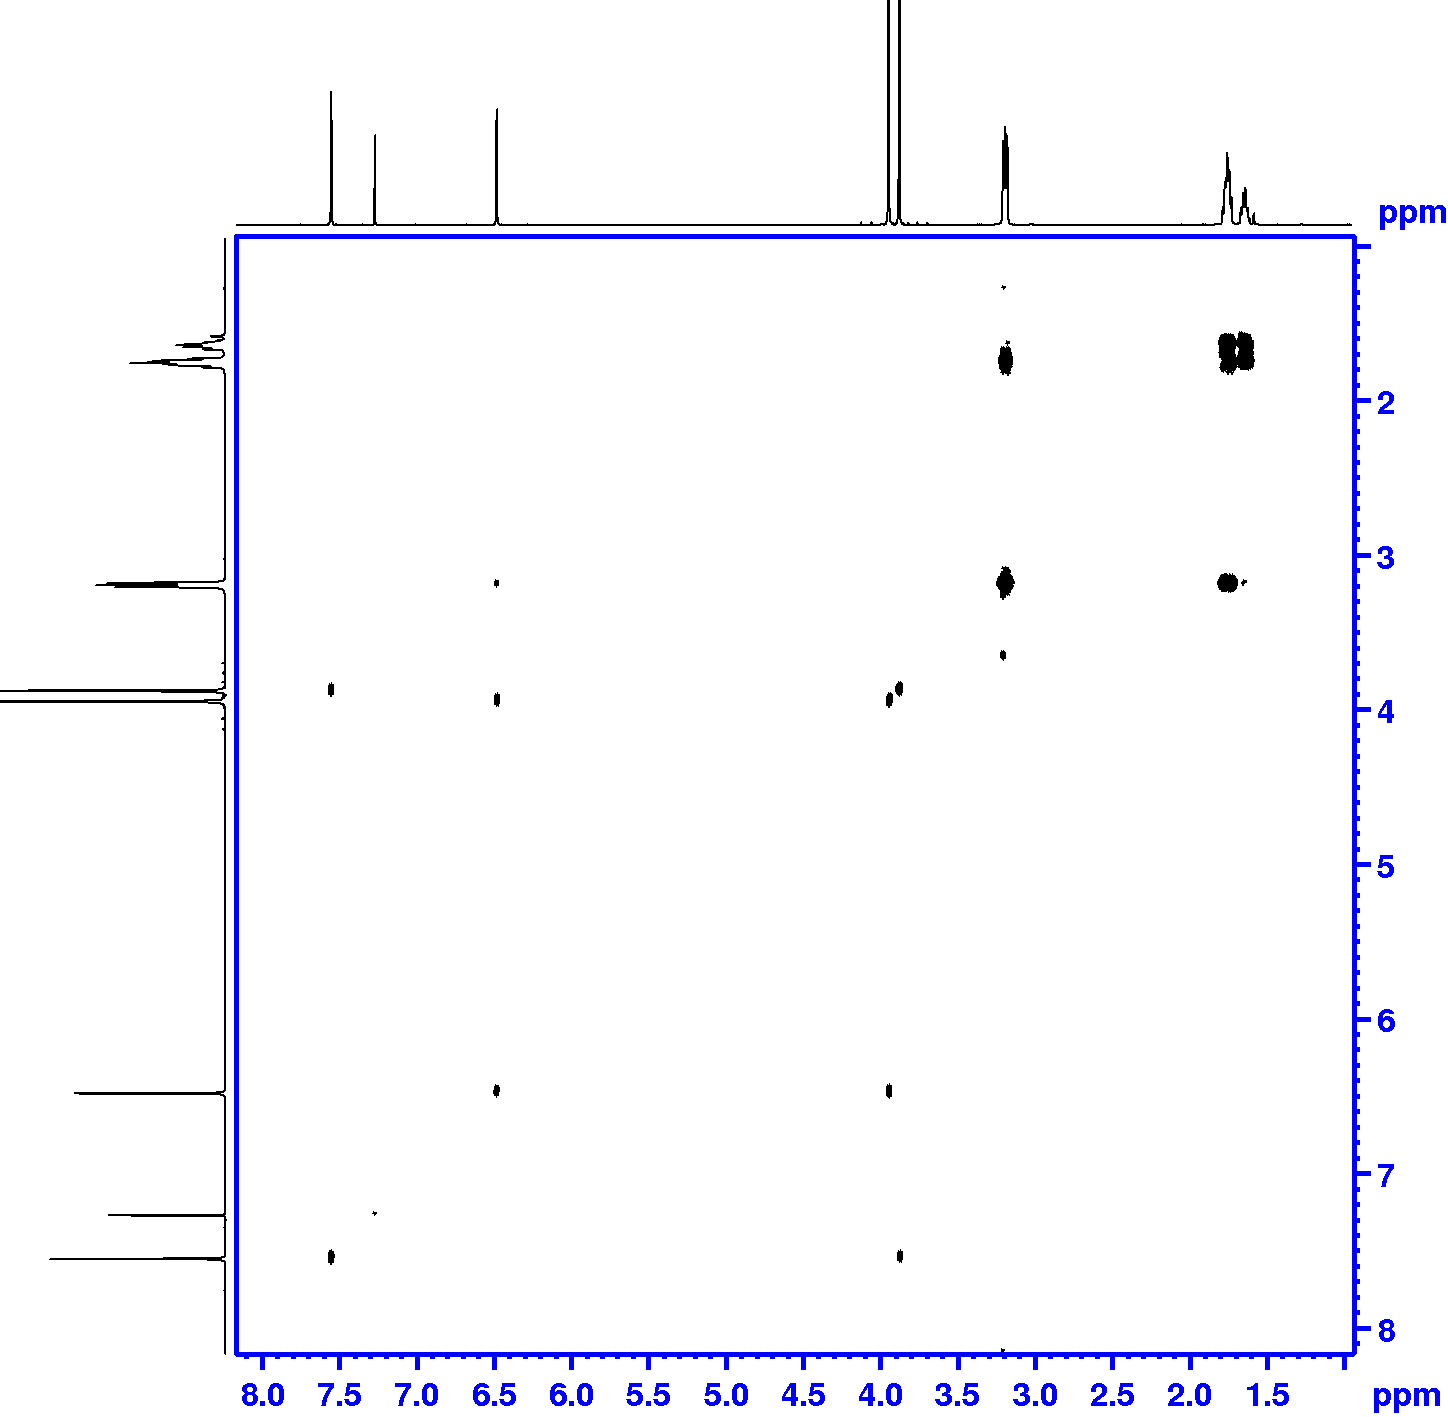


**HSQC of 1-(2,5-dimethoxy-4-nitrophenyl)piperidine (2b) in CDCl3**


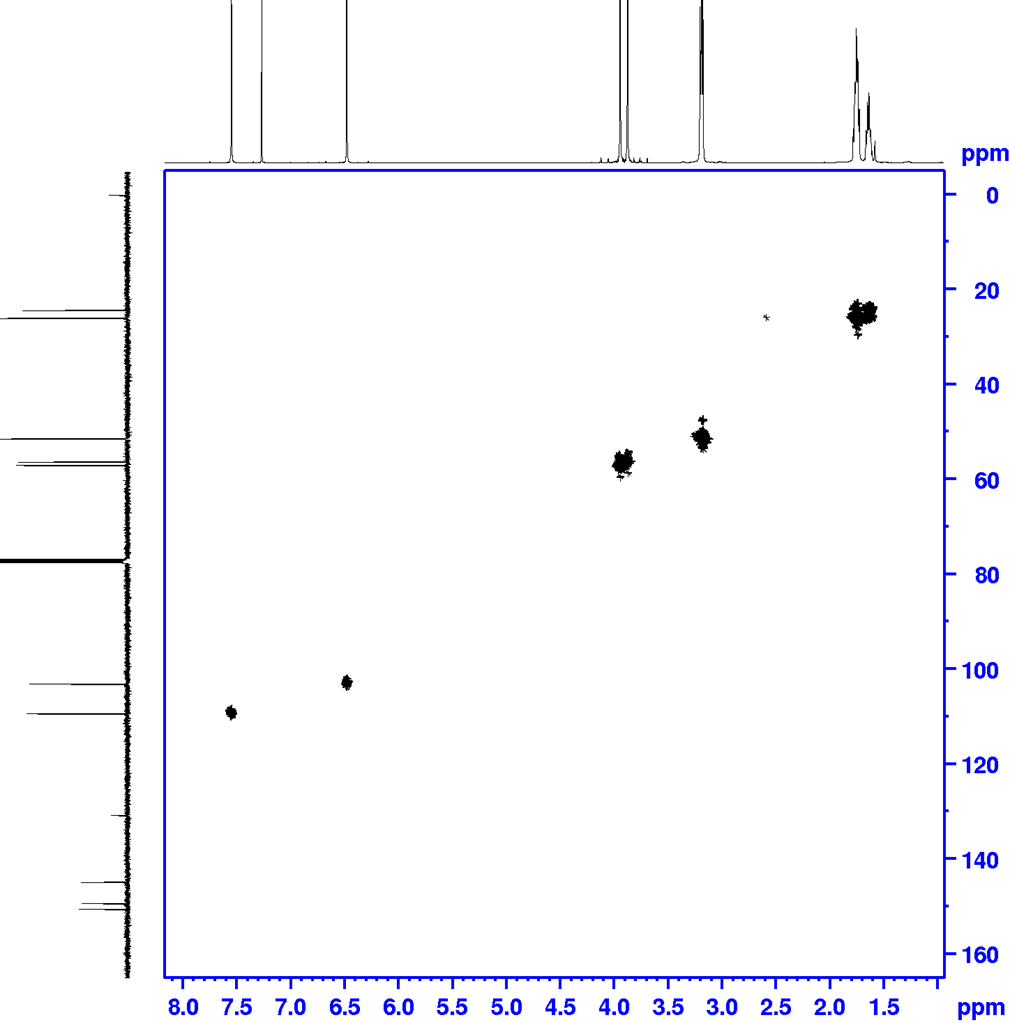


**HRMS of 1-(2,5-dimethoxy-4-nitrophenyl)piperidine (2b)**


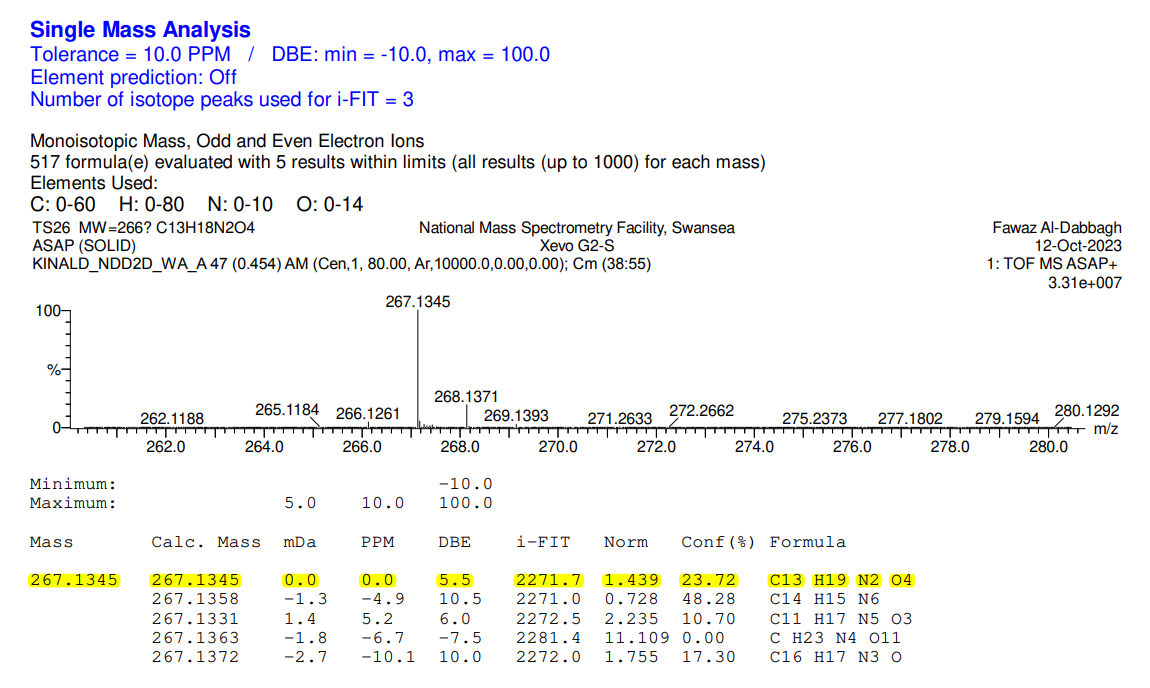


**IR of 1-(2,5-dimethoxy-4-nitrophenyl)pyrrolidine (3b)**


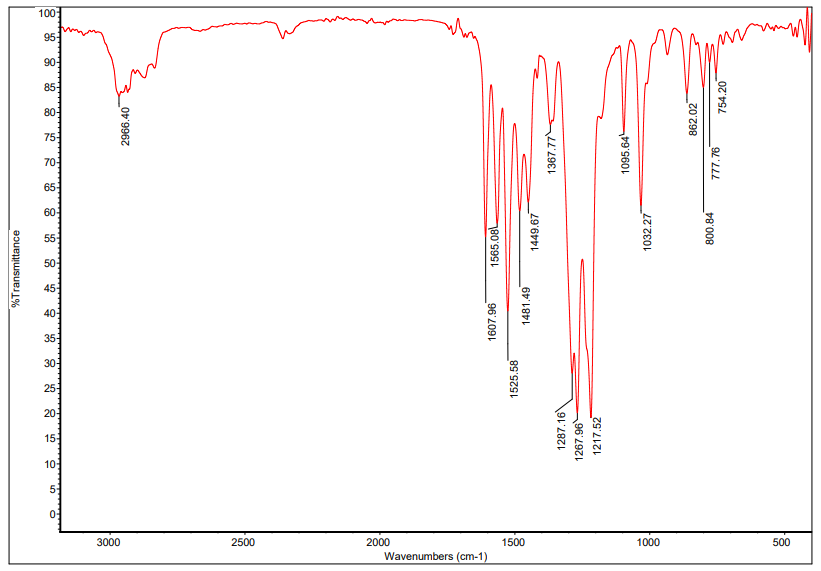


**1H NMR (400 MHz) of 1-(2,5-dimethoxy-4-nitrophenyl)pyrrolidine (3b) in CDCl3**


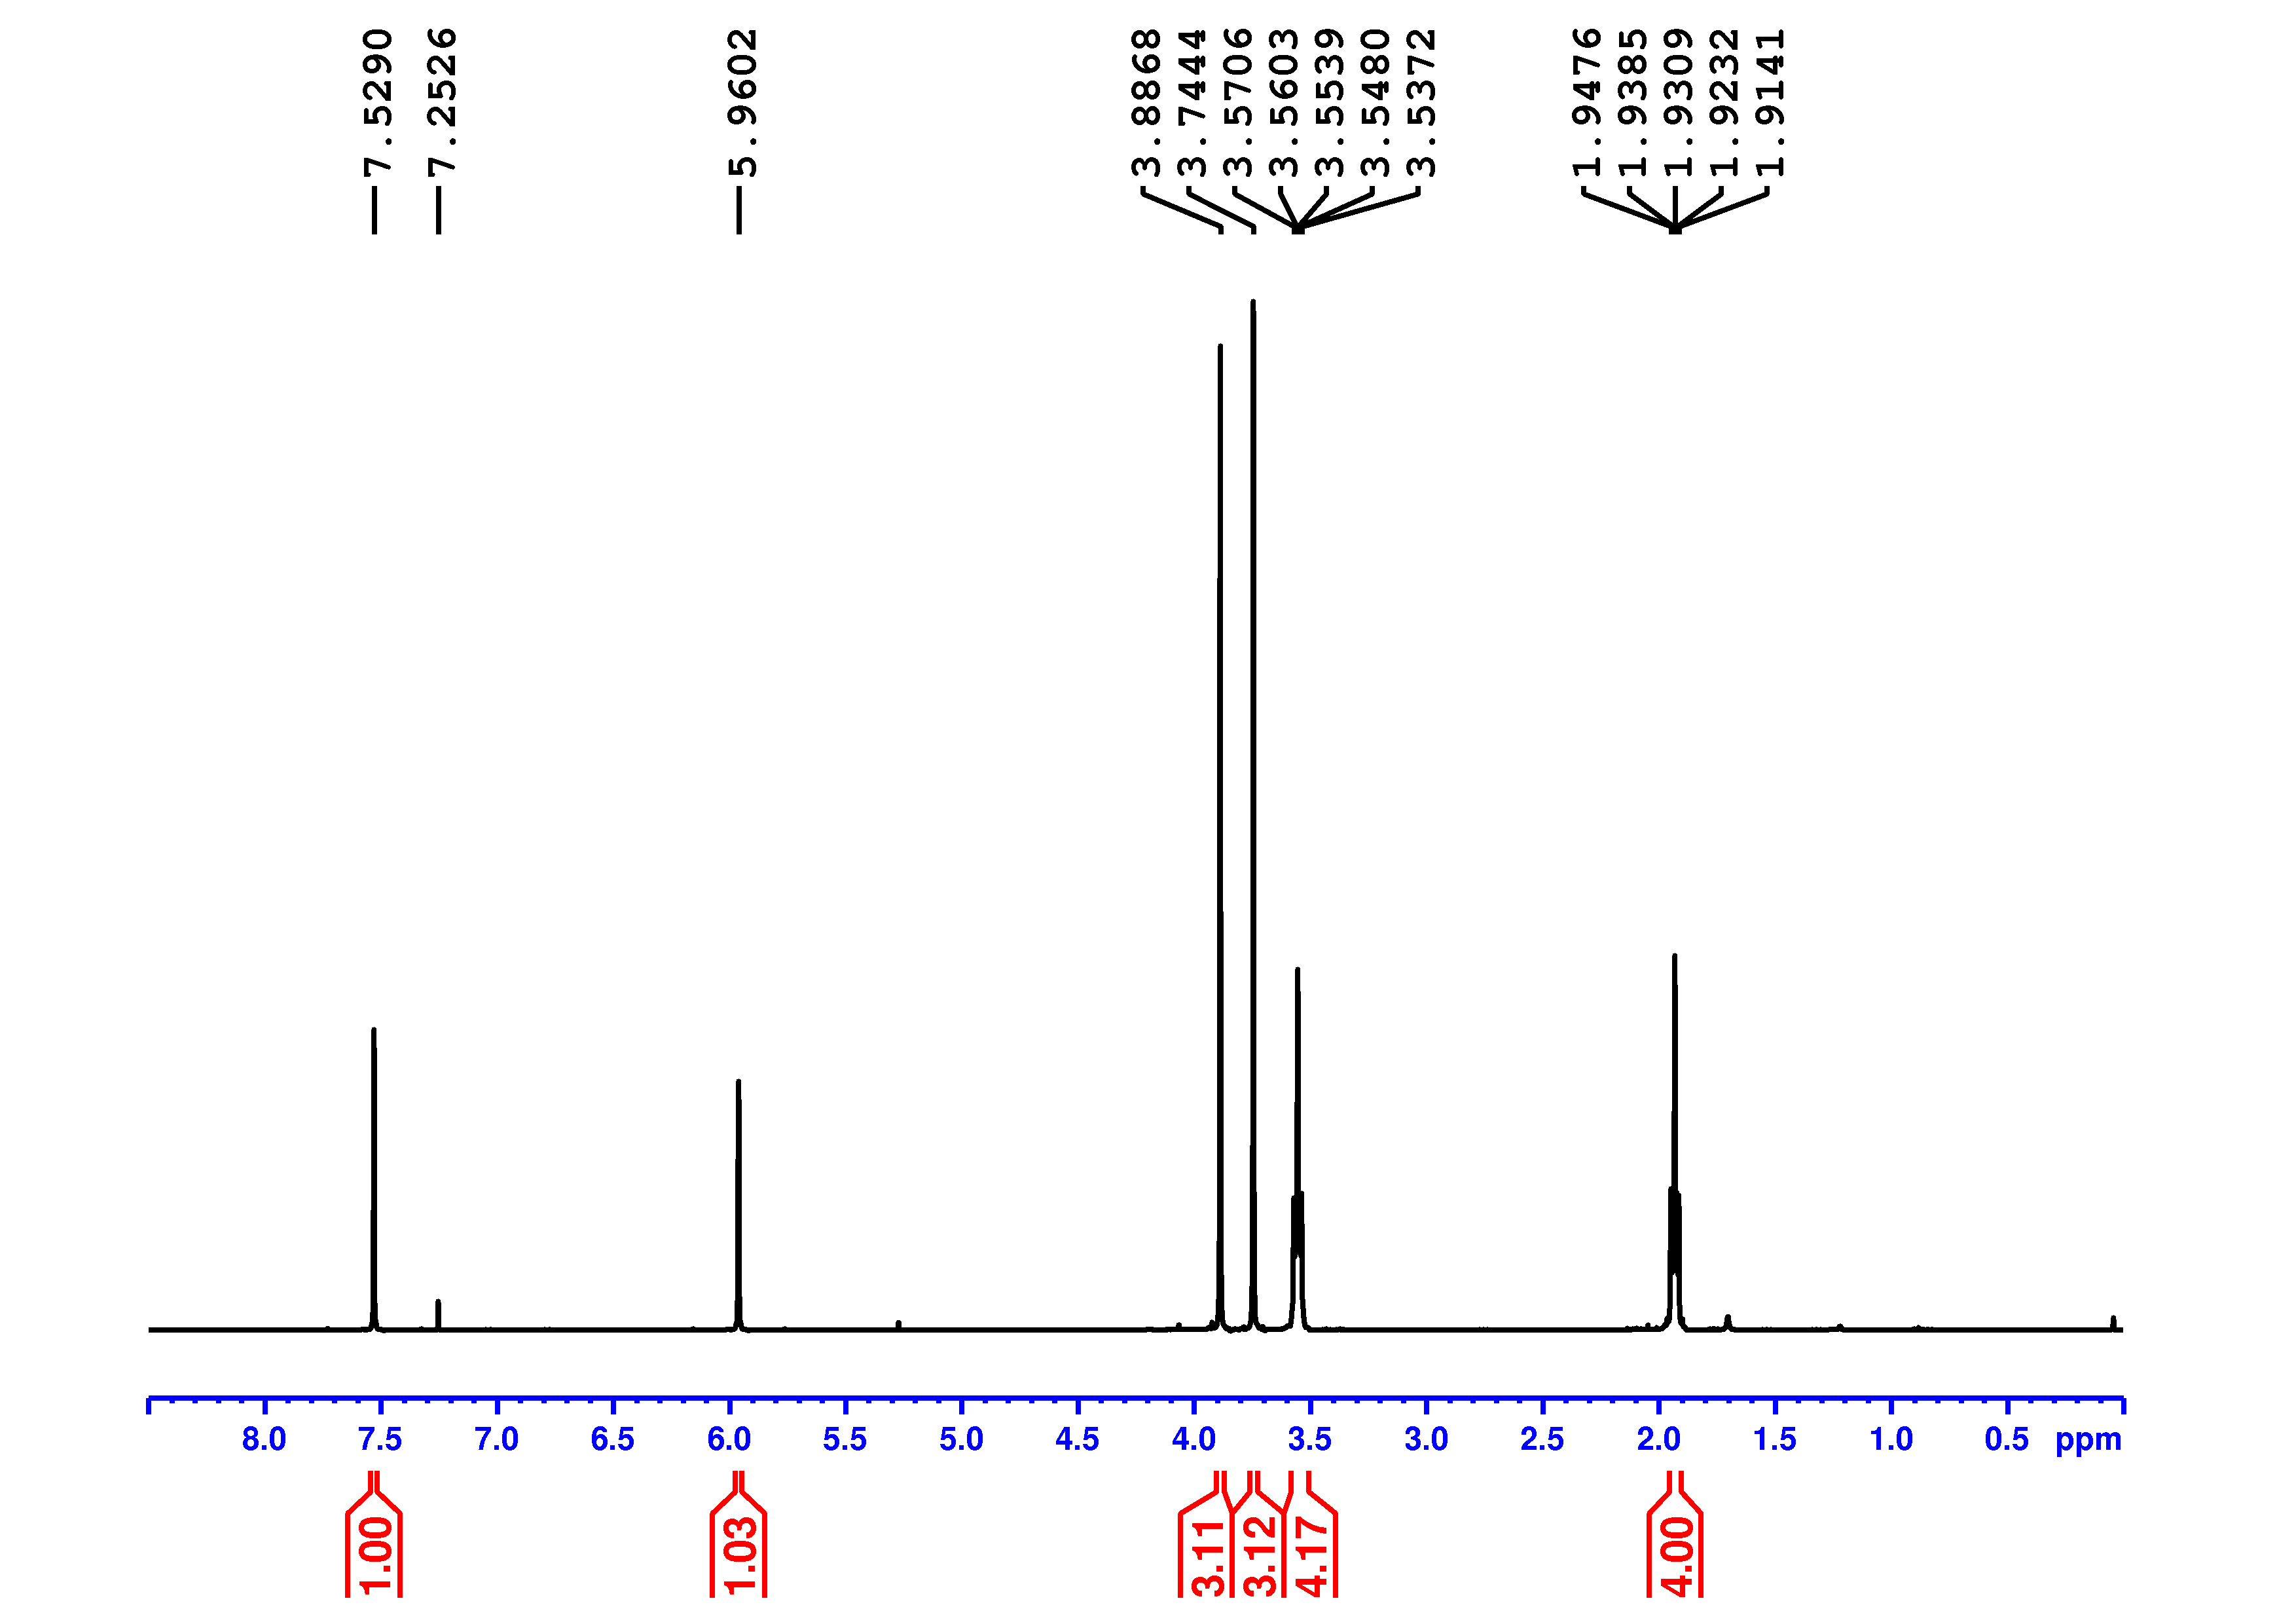


**13C NMR (100 MHz) and DEPT of 1-(2,5-dimethoxy-4-nitrophenyl)pyrrolidine (3b) in CDCl3**


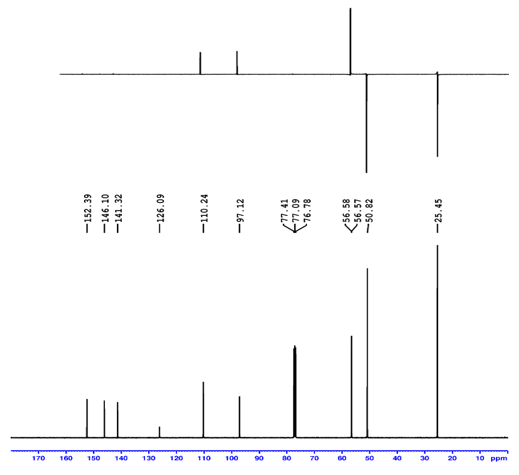


**HRMS of 1-(2,5-dimethoxy-4-nitrophenyl)pyrrolidine (3b)**


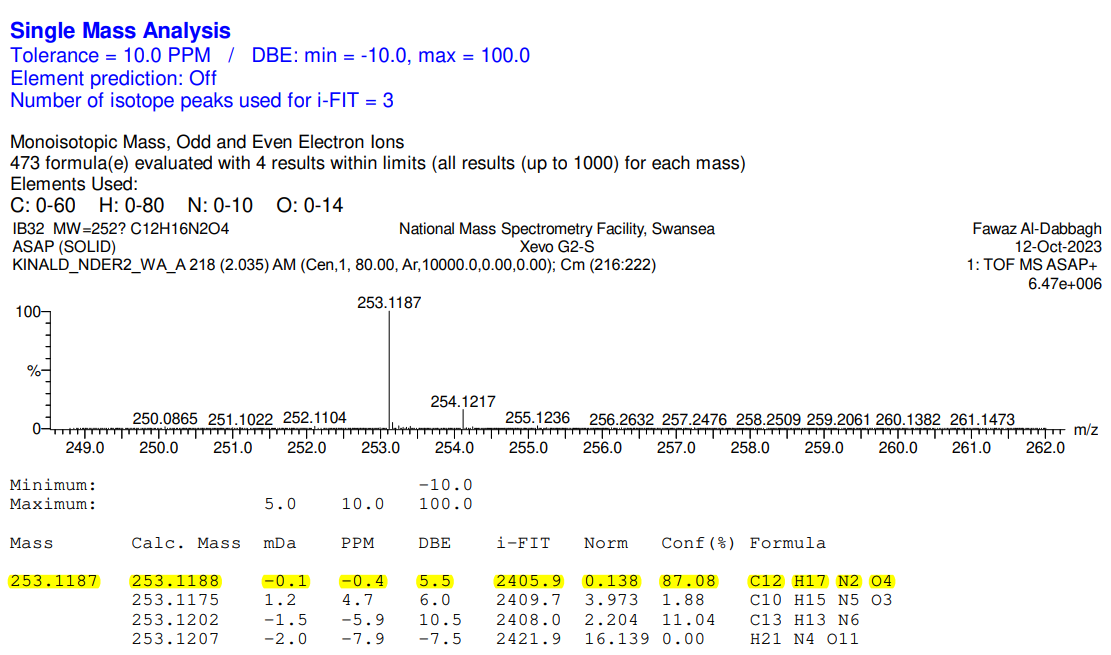

Supplement: Supplementary file 1 [file supplementary]
